# Supplementary material for: Clinical significance of SF3B1 mutations in myelodysplastic syndromes and myelodysplastic/myeloproliferative neoplasms
Source: PubMed Central journal article supplement — Blood. 2011 Oct 12;118(24):6239–46. doi: 10.1182/blood-2011-09-377275 (PMC3236114; doi:10.1182/blood-2011-09-377275), 2011-12-08
Supplement: supp_blood-2011-09-377275_Document1.pdf [file supp_blood-2011-09-377275_Document1.pdf]

**Table S1. *SF3B1* sequencing oligonucleotides**

| <b>Exon</b> | <b>Direction</b> | <b>Oligonucleotide</b> |                             |    |
|-------------|------------------|------------------------|-----------------------------|----|
| Exon 1      | Forward          | 5'                     | GGATTCCTGGGTCACCAC          | 3' |
| Exon 1      | Reverse          | 5'                     | GGCTTTTATTAGGCTAGCAACG      | 3' |
| Exon 2      | Forward          | 5'                     | TGGGAGTTCTTTTGGAAAGTG       | 3' |
| Exon 2      | Reverse          | 5'                     | CAGATGGCTGCAACAAAAGT        | 3' |
| Exon 3      | Forward          | 5'                     | TTTTGAATCTTTGCATATTCTTTCTAA | 3' |
| Exon 3      | Reverse          | 5'                     | TGGGAACTCAGACATTCACCTTTT    | 3' |
| Exon 4      | Forward          | 5'                     | TGTGCTTTATGGTGTTCTGATTTT    | 3' |
| Exon 4      | Reverse          | 5'                     | TCAAAGGGCTAAAGACAACCTAAT    | 3' |
| Exon 5      | Forward          | 5'                     | AGAGCAGGGCAGATAAATCA        | 3' |
| Exon 5      | Reverse          | 5'                     | ACCTAACAGTCTCTCAATCACAACCT  | 3' |
| Exon 6      | Forward          | 5'                     | TGGTAGAAAAATACATTGAAAGCA    | 3' |
| Exon 6      | Reverse          | 5'                     | GCAGACTAATACAGTCCATAACAGAAA | 3' |
| Exon 1      | Forward          | 5'                     | TTTCTGTGTGGGTGTGTGAA        | 3' |
| Exon7       | Reverse          | 5'                     | TTCAGTCTGTAAACATATCACTCAACA | 3' |
| Exon8       | Forward          | 5'                     | AATGGGTCACCATTTTAGGAA       | 3' |
| Exon8       | Reverse          | 5'                     | AACAATTATGTCCAATGAGACAGTTC  | 3' |
| Exon9       | Forward          | 5'                     | AGCAAATAATAGGATTGATCTTAACTG | 3' |
| Exon9       | Reverse          | 5'                     | TCCTAAATACCACCTCATTCAA      | 3' |
| Exon10      | Forward          | 5'                     | TGCAAATATTGTTTATTATGCTGTT   | 3' |
| Exon10      | Reverse          | 5'                     | TGTTAAGGGAAGTTGAAATGTTATGA  | 3' |
| Exon11      | Forward          | 5'                     | TCATAACATTTCAACTCCCTTAACA   | 3' |
| Exon11      | Reverse          | 5'                     | AAGCAACAAACATGACAATTTAACA   | 3' |
| Exon12      | Forward          | 5'                     | GAAACCACACCTATTACTCTGCTC    | 3' |
| Exon12      | Reverse          | 5'                     | AAGGAAAAGGTCTAGGAGAATATGT   | 3' |
| Exon13      | Forward          | 5'                     | CATGAGCATTTCATCAGTAATTG     | 3' |
| Exon13      | Reverse          | 5'                     | TCAACCATTTCTTTCCATAATCAA    | 3' |
| Exon14a     | Forward          | 5'                     | CCAACCTCATGACTGTCCTTTCTT    | 3' |
| Exon14a     | Reverse          | 5'                     | GGGCAACATAGTAAGACCCTGT      | 3' |
| Exon14b     | Forward          | 5'                     | TCTGTTTATGGAATTGATTATGGAA   | 3' |
| Exon14b     | Reverse          | 5'                     | CAACTTACCATGTTCAATGATTTT    | 3' |
| Exon15      | Forward          | 5'                     | TTGGGGCATAGTTAAAACCTG       | 3' |
| Exon15      | Reverse          | 5'                     | AAATCAAAGGTAATTGGTGGA       | 3' |
| Exon16      | Forward          | 5'                     | TCTTCATTAAAGTTAAGGCGACA     | 3' |
| Exon16      | Reverse          | 5'                     | CCAGTTTACATTAACAAATCTGGAA   | 3' |
| Exon17      | Forward          | 5'                     | AAATCACGTAATCAGCAATGAGT     | 3' |
| Exon17      | Reverse          | 5'                     | TGAGTTGAAAGGACTTTTGAGAA     | 3' |
| Exon18      | Forward          | 5'                     | TTGGTTTTTCATGATGTTGCTTT     | 3' |
| Exon18      | Reverse          | 5'                     | GCAATGTGCCATAATAGTTTTTCAT   | 3' |

| <b>Exon</b> | <b>Direction</b> | <b>Oligonucleotide</b> |                            |    |
|-------------|------------------|------------------------|----------------------------|----|
| Exon19      | Forward          | 5'                     | TCAACTGTGCAGTCATAAACCA     | 3' |
| Exon19      | Reverse          | 5'                     | TTTGGGGAAGAAGTAAGAATTTG    | 3' |
| Exon20      | Forward          | 5'                     | GCTGTTGTCATGAAGACTTGTC     | 3' |
| Exon20      | Reverse          | 5'                     | TCTTATGTAACCAGCAAATTCCA    | 3' |
| Exon21      | Forward          | 5'                     | AAGGAAAGTGAACAAAAGTTGC     | 3' |
| Exon21      | Reverse          | 5'                     | AATTGAATACAAAGTGGCCAAA     | 3' |
| Exon22      | Forward          | 5'                     | TCATGTTTTTGAAGACTGAATTTGC  | 3' |
| Exon22      | Reverse          | 5'                     | TGGAAGTATTTTCCAATACCACA    | 3' |
| Exon23      | Forward          | 5'                     | CAGCTTGTTGACCCATTTGTT      | 3' |
| Exon23      | Reverse          | 5'                     | TTCACGATGTTCTAAAATGAAGGA   | 3' |
| Exon24a     | Forward          | 5'                     | TTTAAGGATTTTTCCCCCTTTC     | 3' |
| Exon24a     | Reverse          | 5'                     | CCCTCTAGGGCTCCCAT AAC      | 3' |
| Exon24b     | Forward          | 5'                     | TCGCTGAATCACTTGTTGAA       | 3' |
| Exon24b     | Reverse          | 5'                     | GCAGGGCTTAAAACCTAGATG      | 3' |
| Exon25a     | Forward          | 5'                     | AAAATTGAAATAATGTAACCGTTCAA | 3' |
| Exon25a     | Reverse          | 5'                     | TGACCAGTTCTACTGATCTGC      | 3' |

**Table S2. Indexing oligonucleotides**

| <b>Index</b> | <b>Oligonucleotide</b> |          |    |
|--------------|------------------------|----------|----|
| Forward 1    | 5'                     | AACGTGAT | 3' |
| Forward 2    | 5'                     | ACCACTGT | 3' |
| Forward 3    | 5'                     | ACAAGCTA | 3' |
| Forward 4    | 5'                     | AACCGAGA | 3' |
| Forward 5    | 5'                     | ACGTATCA | 3' |
| Forward 6    | 5'                     | CAATGGAA | 3' |
| Forward 7    | 5'                     | GCCACATA | 3' |
| Forward 8    | 5'                     | TATCAGCA | 3' |
| Reverse 1    | 5'                     | ATGCCTAA | 3' |
| Reverse 2    | 5'                     | AGTGGTCA | 3' |
| Reverse 3    | 5'                     | ACATTGGC | 3' |
| Reverse 4    | 5'                     | CATCAAGT | 3' |
| Reverse 5    | 5'                     | CGCTGATC | 3' |
| Reverse 6    | 5'                     | AGTACAAG | 3' |
| Reverse 7    | 5'                     | ACGCTCGA | 3' |
| Reverse 8    | 5'                     | CAGATCTG | 3' |
| Reverse 9    | 5'                     | AACGCTTA | 3' |
| Reverse 10   | 5'                     | AGATCGCA | 3' |
| Reverse 11   | 5'                     | ACCTCCAA | 3' |
| Reverse 12   | 5'                     | AAGACGGA | 3' |

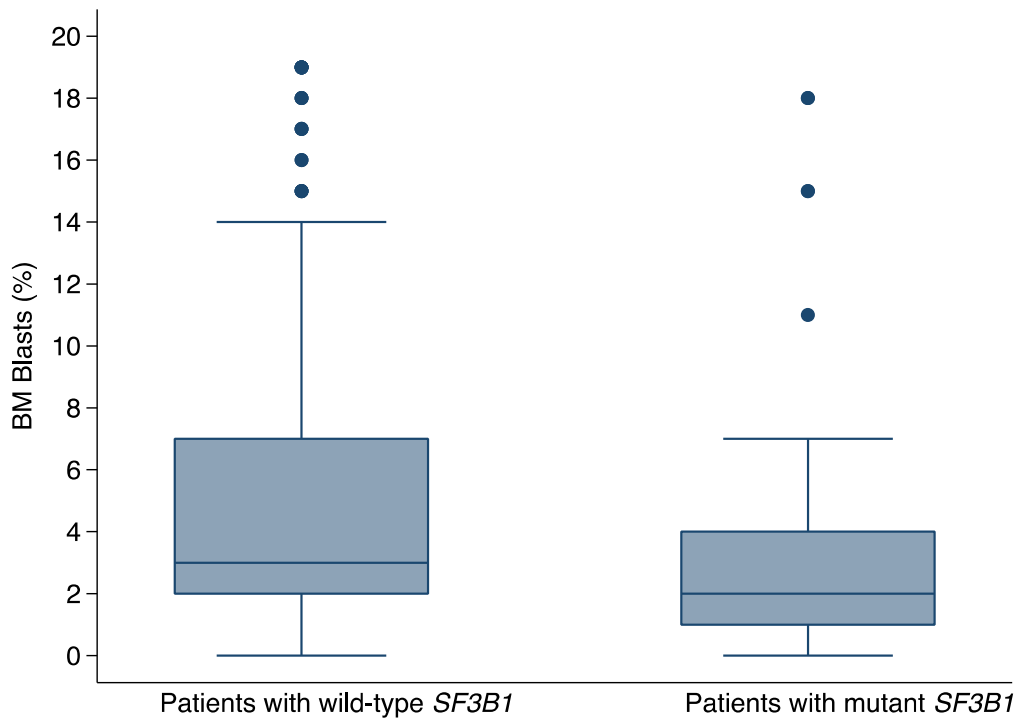

**Figure S1. Relationship between *SF3B1* mutation status and proportion of bone marrow (BM) blasts**

Although median values were close (3% in patients without *SF3B1* mutation vs. 2% in those with *SF3B1* mutation), comparison of the two groups by means of the Mann-Whitney test showed a significant lower proportion of bone marrow blasts in patients with *SF3B1* mutation ( $P < .001$ ). Data are shown in a box plot depicting the smallest and largest observation (lowest and highest line, respectively), lower and upper quartile with median value (box), and outliers (dots).

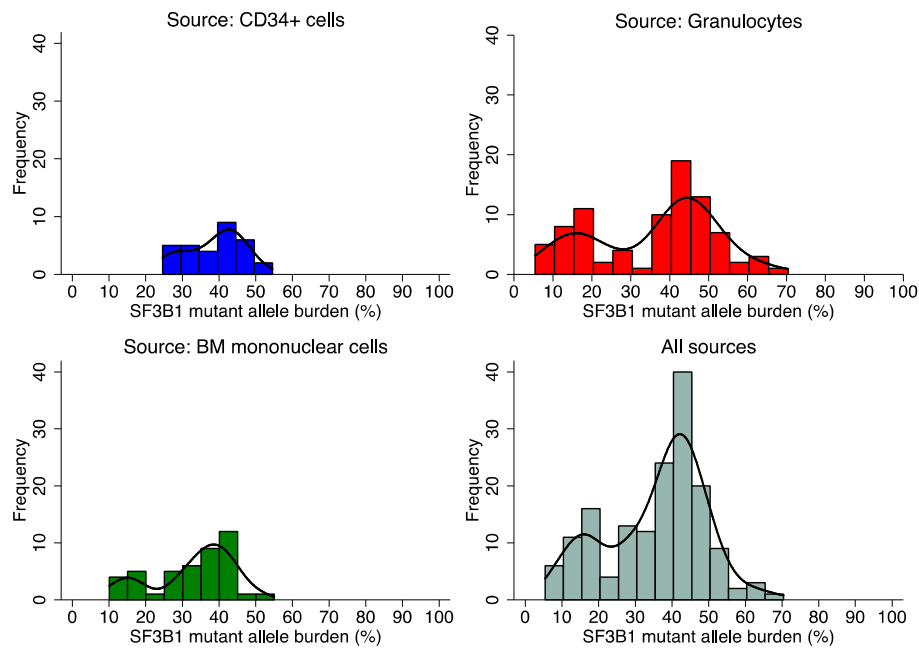

**Figure S2. Histogram of *SF3B1* mutant allele burden in DNA samples from different sources**

Median values for *SF3B1* mutant allele burden were 40.6% (24.6-52.1%) in the CD34-positive cell DNA subgroup, 40.9% (7.5-70.3%) in the granulocyte DNA subgroup, and 35.7% (10.1-51.1%) in the bone marrow DNA subgroup. Kruskal–Wallis one-way analysis of variance by ranks showed no significant difference in *SF3B1* mutant allele burden between these subgroups ( $P=.077$ ). In each group, the bimodal distribution has been highlighted by adding a Gaussian kernel density plot to the histogram.
